# Supplementary material for: Association of the TP53 rs1042522 C>G polymorphism and hepatoblastoma risk in Chinese children
Source: PubMed Central journal article supplement — J Cancer. 2019 Jun 9;10(15):3444–9. doi: 10.7150/jca.33063 (PMC6603402; doi:10.7150/jca.33063), 2019-06-09
Supplement: jcav10p3444s1.pdf [file jcav10p3444s1.pdf]

**Supplemental Table 1.** Frequency distribution of selected variables in hepatoblastoma patients and controls.

| Variables         | Guangdong Province |                       |                       | Henan Province    |                       |                       | Shaanxi Province  |                       |                       | Shannxi Province  |                       |                       |
|-------------------|--------------------|-----------------------|-----------------------|-------------------|-----------------------|-----------------------|-------------------|-----------------------|-----------------------|-------------------|-----------------------|-----------------------|
|                   | Cases<br>(n = 146) | Controls<br>(n = 438) | <i>P</i> <sup>a</sup> | Cases<br>(n = 42) | Controls<br>(n = 176) | <i>P</i> <sup>a</sup> | Cases<br>(n = 15) | Controls<br>(n = 186) | <i>P</i> <sup>a</sup> | Cases<br>(n = 10) | Controls<br>(n = 158) | <i>P</i> <sup>a</sup> |
|                   | No. (%)            | No. (%)               |                       | No. (%)           | No. (%)               |                       | No. (%)           | No. (%)               |                       | No. (%)           | No. (%)               |                       |
| Age range, months | 0.63-149.97        | 0.07-156.00           | 0.214                 | 0.83-108.00       | 0.10-108.00           | 0.285                 | 3.60-72.00        | 0.03-60.00            | 0.286                 | 0.23-72.00        | 0.004-60.00           | 0.785                 |
| Mean ± SD         | 23.16 ± 24.59      | 23.11 ± 18.62         |                       | 26.73 ± 24.96     | 27.28 ± 18.87         |                       | 21.50 ± 24.20     | 23.66 ± 16.66         |                       | 20.32 ± 20.38     | 21.70 ± 18.28         |                       |
| <17               | 79 (54.11)         | 211 (48.17)           |                       | 21 (50.00)        | 72 (40.91)            |                       | 9 (60.00)         | 85 (45.70)            |                       | 5 (50.00)         | 86 (54.43)            |                       |
| ≥17               | 67 (45.89)         | 227 (51.83)           |                       | 21 (50.00)        | 104 (59.09)           |                       | 6 (40.00)         | 101 (54.30)           |                       | 5 (50.00)         | 72 (45.57)            |                       |
| Gender            |                    |                       | 0.961                 |                   |                       | 0.830                 |                   |                       | 0.544                 |                   |                       | 0.912                 |
| Female            | 58 (39.73)         | 175 (39.95)           |                       | 15 (35.71)        | 66 (37.50)            |                       | 7 (46.67)         | 72 (38.71)            |                       | 4 (40.00)         | 66 (41.77)            |                       |
| Male              | 88 (60.27)         | 263 (60.05)           |                       | 27 (64.29)        | 110 (62.50)           |                       | 8 (53.33)         | 114 (61.29)           |                       | 6 (60.00)         | 92 (58.23)            |                       |
| Clinical stage    |                    |                       |                       |                   |                       |                       |                   |                       |                       |                   |                       |                       |
| I                 | 6 (4.11)           | /                     |                       | 19 (45.24)        | /                     |                       | 15 (100.00)       | /                     |                       | 2 (20.00)         | /                     |                       |
| II                | 46 (31.51)         | /                     |                       | 3 (7.14)          | /                     |                       | /                 | /                     |                       | 6 (60.00)         | /                     |                       |
| III               | 37 (35.34)         | /                     |                       | 3 (7.14)          | /                     |                       | /                 | /                     |                       | 0 (0.00)          | /                     |                       |
| IV                | 12 (8.22)          | /                     |                       | 1 (2.38)          | /                     |                       | /                 | /                     |                       | 2 (20.00)         | /                     |                       |
| NA                | 45 (30.82)         | /                     |                       | 16 (38.10)        | /                     |                       | /                 | /                     |                       | /                 | /                     |                       |

<sup>a</sup> Based on a two-sided  $\chi^2$  test for distributions between hepatoblastoma patients and cancer-free controls.
